# Supplementary material for: Surfactant-free aqueous synthesis of novel Ba3Gd2F12:Ln3+ nanocrystals with luminescence properties
Source: Royal Society of Chemistry journal article supplement (doi:10.1039/c8ce01538d), 2018-01-01
Supplement: c8ce01538d1.pdf [file c8ce01538d1.pdf]

## Surfactant-Free Aqueous Synthesis of Novel $\text{Ba}_3\text{Gd}_2\text{F}_{12}:\text{Ln}^{3+}$ Nanocrystals with Luminescence Properties

Yang Feng,<sup>a,b</sup> Baiqi Shao,<sup>\*a</sup> Shuang Zhao,<sup>a,†</sup> and Hongpeng You<sup>\*a</sup>

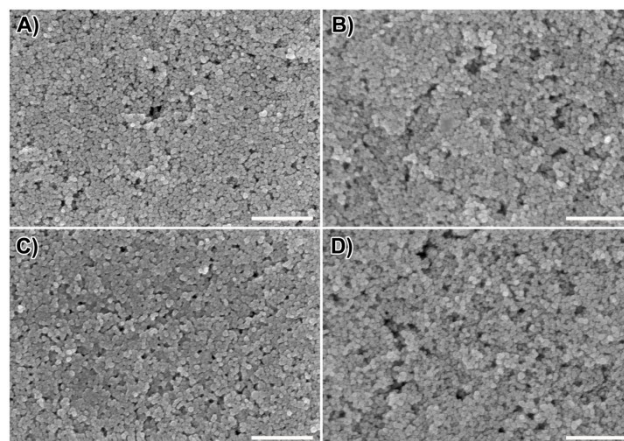

**Figure S1** SEM images of the  $\text{Ba}_3\text{Gd}_2\text{F}_{12}$  products synthesized with different pH values: (A) 3, (B) 5, (C) 7, (D) 9. The scale bars are 500 nm. The pH was adjusted by HCl (1M) and NaOH (1M) solution.

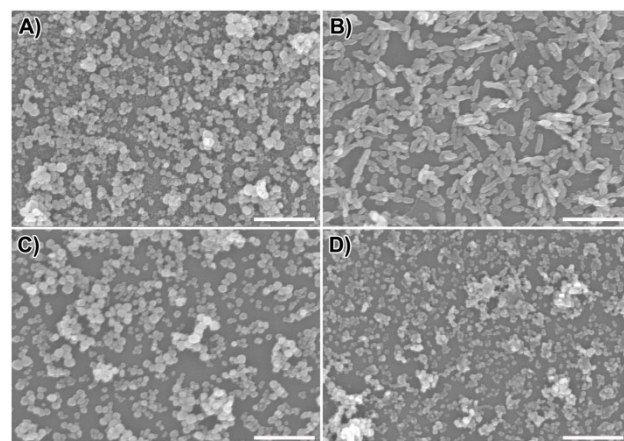

**Figure S2** SEM images of the  $\text{Ba}_3\text{Gd}_2\text{F}_{12}$  products synthesized with different fluorine sources: (A)  $\text{NH}_4\text{F}$ , (B)  $\text{HF}$ , (C)  $\text{KHF}_2$ , (D)  $\text{NH}_4\text{HF}_2$ . The scale bars are 500 nm.
